# Supplementary material for: Prevalence of Plasmodium falciparum Molecular Markers of Antimalarial Drug Resistance in a Residual Malaria Focus Area in Sabah, Malaysia
Source: PubMed Central journal article supplement (PMC5082862; doi:10.1371/journal.pone.0165515), 2016-10-27
Supplement: pone.0165515.s001.pdf [file pone.0165515.s001.pdf]

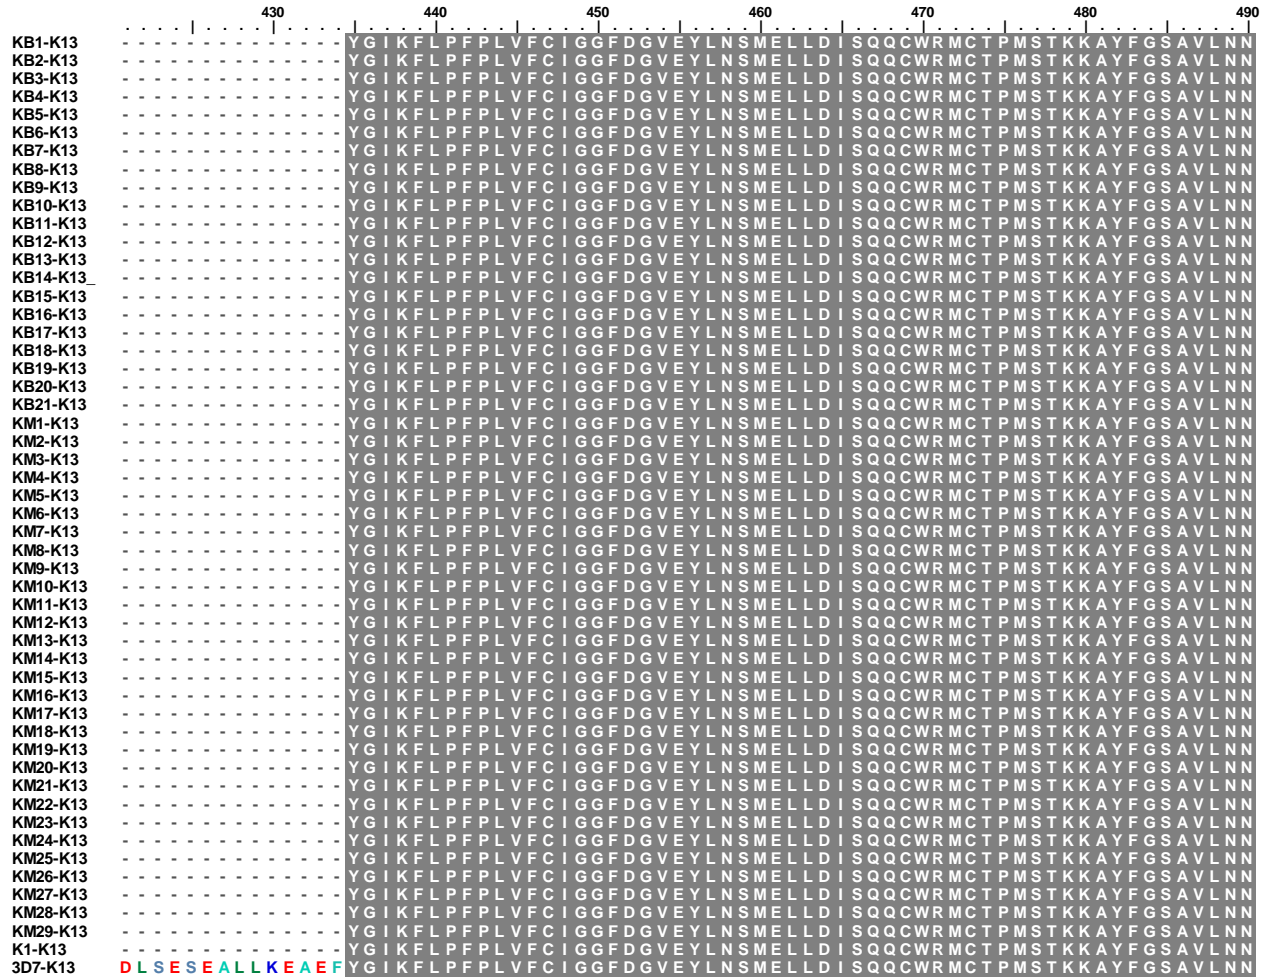

**S1 Fig.** Sequencing alignment of K13 propeller region at amino acid position 435-690. The *P. falciparum* 3D7 and K1 strains are the artemisinin sensitive control. KM, Kota Marudu isolate and KB, Kalabakan isolate.





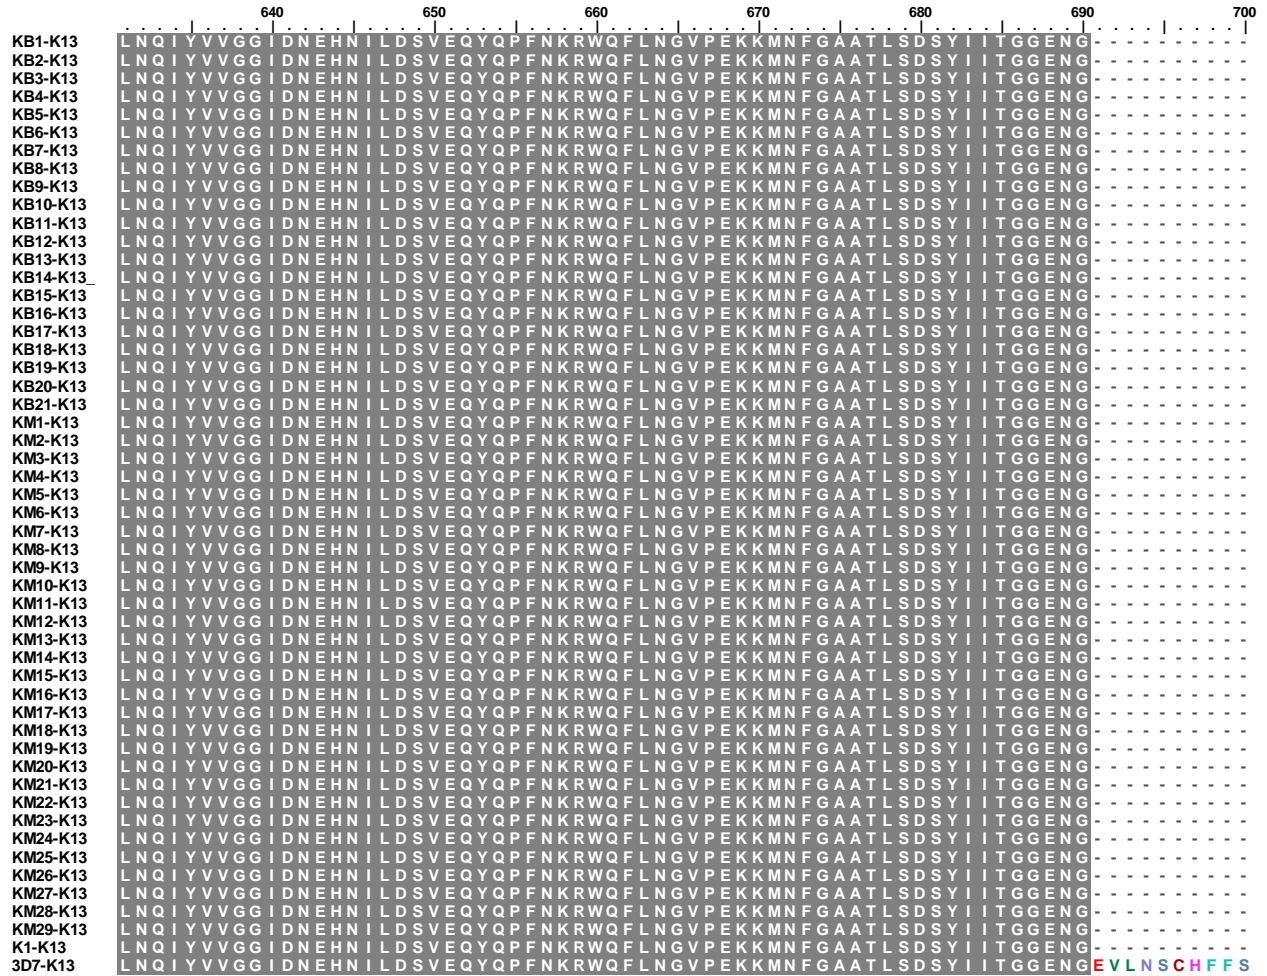

S1 Fig. Sequencing alignment of K13 propeller region at amino acid position 435-690. The *P. falciparum* 3D7 and K1 strains are the artemisinin sensitive control. KM, Kota Marudu isolate and KB, Kalabakan isolate.
