# Supplementary material for: Prevalence of Plasmodium falciparum Molecular Markers of Antimalarial Drug Resistance in a Residual Malaria Focus Area in Sabah, Malaysia
Source: PubMed Central journal article supplement (PMC5082862; doi:10.1371/journal.pone.0165515), 2016-10-27
Supplement: pone.0165515.s002.pdf [file pone.0165515.s002.pdf]

**S1 Table. Copy number of *pfmdr1* on the *P. falciparum* isolates.  
Samples code: KB, Kalabakan; KM, Kota Marudu.**

| Sample name          | Code | Copy number  | OVERALL MEAN |
|----------------------|------|--------------|--------------|
| Control low copy no  | 3D7  | 1.04         | 0.97         |
| Control low copy no  |      | 1.06         |              |
| Control low copy no  | 3D7  | 0.82         | 1.03         |
| Control low copy no  |      | 0.95         |              |
| Control low copy no  | 3D7  | 1.08         | 1.01         |
| Control low copy no  |      | 1.07         |              |
| Control low copy no  |      | 1.05         |              |
| Control low copy no  |      | 1.08         |              |
| Control low copy no  |      | 0.90         |              |
| Control high copy no | IC   | 2.59         | 2.52         |
| Control high copy no | IC   | 2.35         |              |
| Control high copy no | IC   | 2.63         |              |
| Sample               | KB1  | 1.01         | 1.00         |
| Sample               | KB1  | 1.06         |              |
| Sample               | KB1  | 0.93         |              |
| Sample               | KB2  | 1.03         | 1.05         |
| Sample               | KB2  | 1.07         |              |
| Sample               | KB2  | 1.07         |              |
| Sample               | KB3  | 0.93         | 0.88         |
| Sample               | KB3  | 0.75         |              |
| Sample               | KB3  | 0.97         |              |
| Sample               | KB4  | 0.83         | 0.99         |
| Sample               | KB4  | 1.14         |              |
| Sample               | KB4  | 1.01         |              |
| Sample               | KB5  | 0.76         | 0.91         |
| Sample               | KB5  | 1.07         |              |
| Sample               | KB5  | 0.90         |              |
| Sample               | KB6  | 0.91         | 1.01         |
| Sample               | KB6  | 1.36         |              |
| Sample               | KB6  | 0.75         |              |
| Sample               | KB7  | 0.92         | 0.96         |
| Sample               | KB7  | 1.04         |              |
| Sample               | KB7  | 0.92         |              |
| Sample               | KB8  | 0.93         | 0.83         |
| Sample               | KB8  | 0.88         |              |
| Sample               | KB8  | 0.70         |              |
| Sample               | KB9  | 1.01         | 1.04         |
| Sample               | KB9  | 1.11         |              |
| Sample               | KB9  | 0.99         |              |
| Sample               | KB10 | 1.06         | 1.08         |
| Sample               | KB10 | 0.91         |              |
| Sample               | KB10 | 1.27         |              |
| Sample               | KB11 | 0.82         | 0.90         |
| Sample               | KB11 | 0.89         |              |
| Sample               | KB11 | 0.98         |              |
| Sample               | KB12 | 1.60         | 1.14         |
| Sample               | KB12 | 0.70         |              |
| Sample               | KB12 | 1.12         |              |
| Sample               | KB13 | 1.04         | 1.03         |
| Sample               | KB13 | 1.04         |              |
| Sample               | KB13 | 1.03         |              |
| Sample               | KB14 | 1.15         | 1.35         |
| Sample               | KB14 | No detection |              |
| Sample               | KB14 | 1.56         |              |
| Sample               | KB15 | 1.07         | 1.13         |
| Sample               | KB15 | 1.13         |              |
| Sample               | KB15 | 1.20         |              |
| Sample               | KB16 | 1.12         | 1.11         |
| Sample               | KB16 | 1.04         |              |
| Sample               | KB16 | 1.18         |              |
| Sample               | KM1  | 1.39         | 1.43         |
| Sample               | KM1  | 1.48         |              |
| Sample               | KM1  | 1.41         |              |
| Sample               | KM2  | 0.90         | 0.94         |

|        |      |              |      |
|--------|------|--------------|------|
| Sample | KM2  | 0.91         |      |
| Sample | KM2  | 0.99         |      |
| Sample | KM3  | 1.15         | 1.10 |
| Sample | KM3  | 1.09         |      |
| Sample | KM3  | 1.06         |      |
| Sample | KM4  | 1.36         | 1.35 |
| Sample | KM4  | 1.07         |      |
| Sample | KM4  | 1.62         |      |
| Sample | KM5  | 1.07         | 1.20 |
| Sample | KM5  | 1.21         |      |
| Sample | KM5  | 1.30         |      |
| Sample | KM6  | 1.22         | 1.20 |
| Sample | KM6  | 1.31         |      |
| Sample | KM6  | 1.07         |      |
| Sample | KM7  | 1.19         | 1.28 |
| Sample | KM7  | 1.27         |      |
| Sample | KM7  | 1.38         |      |
| Sample | KM8  | 1.24         | 1.20 |
| Sample | KM8  | 0.99         |      |
| Sample | KM8  | 1.38         |      |
| Sample | KM9  | 1.25         | 1.36 |
| Sample | KM9  | 1.30         |      |
| Sample | KM9  | 1.53         |      |
| Sample | KM10 | No detection | 0.84 |
| Sample | KM10 | 0.88         |      |
| Sample | KM10 | 0.80         |      |
| Sample | KM11 | 1.23         | 1.17 |
| Sample | KM11 | 1.16         |      |
| Sample | KM11 | 1.13         |      |
| Sample | KM12 | 1.16         | 1.10 |
| Sample | KM12 | 0.97         |      |
| Sample | KM12 | 1.16         |      |
| Sample | KM13 | 0.95         | 1.05 |
| Sample | KM13 | 1.15         |      |
| Sample | KM13 | 1.04         |      |
| Sample | KM14 | 1.67         | 1.40 |
| Sample | KM14 | 1.38         |      |
| Sample | KM14 | 1.15         |      |
| Sample | KM15 | 1.15         | 1.34 |
| Sample | KM15 | 1.19         |      |
| Sample | KM15 | 1.67         |      |
| Sample | KM16 | 1.29         | 1.27 |
| Sample | KM16 | 1.24         |      |
| Sample | KM16 | 1.27         |      |
| Sample | KM17 | 0.90         | 0.89 |
| Sample | KM17 | 0.97         |      |
| Sample | KM17 | 0.79         |      |
| Sample | KM18 | 0.92         | 0.89 |
| Sample | KM18 | 0.86         |      |
| Sample | KM18 | 0.89         |      |
| Sample | KM19 | 0.90         | 1.00 |
| Sample | KM19 | 1.02         |      |
| Sample | KM19 | 1.08         |      |
| Sample | KM20 | 0.96         | 0.96 |
| Sample | KM20 | 1.08         |      |
| Sample | KM20 | 0.84         |      |
| Sample | KM21 | 1.05         | 1.04 |
| Sample | KM21 | 1.01         |      |
| Sample | KM21 | 1.06         |      |
| Sample | KM22 | 1.07         | 0.95 |
| Sample | KM22 | 1.07         |      |
| Sample | KM22 | 0.71         |      |
